# Supplementary material for: Traditional prenatal and postpartum food restrictions among women in northern Lao PDR
Source: PubMed Central journal article supplement (PMC8710103; doi:10.1111/mcn.13273), 2021-09-30
Supplement: MCN-18-e13273-s001.pdf [file MCN-18-e13273-s001.pdf]

**Table S1.** Percent of women within each cluster who reported that they would allow food groups in months 1 and 2 postpartum

| <b>Food group</b>               | <b>Timepoint</b> | <b>Most restrictive<br/>(n = 127)</b> | <b>Least restrictive<br/>(n = 99)</b> | <b>2 weeks restrictive<br/>(n = 31)</b> | <b>1 month restrictive<br/>(n = 415)</b> |
|---------------------------------|------------------|---------------------------------------|---------------------------------------|-----------------------------------------|------------------------------------------|
| <b>Other grains<sup>†</sup></b> | Week 1           | 3                                     | 80                                    | 0                                       | 0                                        |
|                                 | Week 2           | 3                                     | 100                                   | 3                                       | 0                                        |
|                                 | Week 3           | 2                                     | 100                                   | 61                                      | 0                                        |
|                                 | Week 4           | 2                                     | 100                                   | 100                                     | 0                                        |
|                                 | Month 2          | 2                                     | 100                                   | 100                                     | 100                                      |
| <b>Meat</b>                     | Week 1           | 0                                     | 70                                    | 0                                       | 0                                        |
|                                 | Week 2           | 0                                     | 84                                    | 3                                       | 0                                        |
|                                 | Week 3           | 0                                     | 84                                    | 55                                      | 0                                        |
|                                 | Week 4           | 0                                     | 84                                    | 94                                      | 0                                        |
|                                 | Month 2          | 0                                     | 87                                    | 94                                      | 98                                       |
| <b>Poultry</b>                  | Week 1           | 2                                     | 78                                    | 3                                       | 0                                        |
|                                 | Week 2           | 2                                     | 99                                    | 6                                       | 0                                        |
|                                 | Week 3           | 2                                     | 99                                    | 65                                      | 0                                        |
|                                 | Week 4           | 2                                     | 99                                    | 100                                     | 0                                        |
|                                 | Month 2          | 2                                     | 99                                    | 100                                     | 100                                      |
| <b>Fish</b>                     | Week 1           | 3                                     | 79                                    | 0                                       | 2                                        |
|                                 | Week 2           | 5                                     | 98                                    | 0                                       | 2                                        |
|                                 | Week 3           | 4                                     | 98                                    | 58                                      | 2                                        |
|                                 | Week 4           | 4                                     | 98                                    | 97                                      | 2                                        |
|                                 | Month 2          | 4                                     | 98                                    | 97                                      | 100                                      |
| <b>Wild animals</b>             | Week 1           | 2                                     | 72                                    | 0                                       | 0                                        |
|                                 | Week 2           | 2                                     | 92                                    | 0                                       | 0                                        |
|                                 | Week 3           | 1                                     | 92                                    | 52                                      | 0                                        |
|                                 | Week 4           | 1                                     | 92                                    | 90                                      | 0                                        |
|                                 | Month 2          | 1                                     | 94                                    | 90                                      | 98                                       |
| <b>Eggs</b>                     | Week 1           | 4                                     | 80                                    | 10                                      | 1                                        |
|                                 | Week 2           | 4                                     | 100                                   | 13                                      | 1                                        |
|                                 | Week 3           | 3                                     | 100                                   | 68                                      | 1                                        |
|                                 | Week 4           | 3                                     | 100                                   | 100                                     | 1                                        |
|                                 | Month 2          | 3                                     | 100                                   | 100                                     | 100                                      |
| <b>Vegetables</b>               | Week 1           | 21                                    | 84                                    | 13                                      | 12                                       |
|                                 | Week 2           | 22                                    | 100                                   | 19                                      | 13                                       |
|                                 | Week 3           | 23                                    | 100                                   | 68                                      | 13                                       |
|                                 | Week 4           | 25                                    | 100                                   | 100                                     | 13                                       |
|                                 | Month 2          | 26                                    | 100                                   | 100                                     | 100                                      |
| <b>Fruits</b>                   | Week 1           | 9                                     | 80                                    | 0                                       | 2                                        |
|                                 | Week 2           | 9                                     | 100                                   | 6                                       | 2                                        |
|                                 | Week 3           | 8                                     | 100                                   | 58                                      | 2                                        |
|                                 | Week 4           | 9                                     | 100                                   | 97                                      | 2                                        |
|                                 | Month 2          | 10                                    | 100                                   | 97                                      | 100                                      |
| <b>Roots and tubers</b>         | Week 1           | 0                                     | 80                                    | 0                                       | 0                                        |
|                                 | Week 2           | 0                                     | 100                                   | 3                                       | 0                                        |
|                                 | Week 3           | 0                                     | 100                                   | 61                                      | 0                                        |
|                                 | Week 4           | 0                                     | 100                                   | 100                                     | 0                                        |
|                                 | Month 2          | 0                                     | 100                                   | 100                                     | 100                                      |
| <b>Pulses</b>                   | Week 1           | 0                                     | 80                                    | 0                                       | 0                                        |
|                                 | Week 2           | 0                                     | 100                                   | 3                                       | 0                                        |
|                                 | Week 3           | 0                                     | 100                                   | 61                                      | 0                                        |
|                                 | Week 4           | 0                                     | 100                                   | 100                                     | 0                                        |
|                                 | Month 2          | 0                                     | 100                                   | 100                                     | 100                                      |

|                       |         |   |     |     |     |
|-----------------------|---------|---|-----|-----|-----|
| <b>Nuts and seeds</b> | Week 1  | 0 | 80  | 0   | 0   |
|                       | Week 2  | 0 | 100 | 3   | 0   |
|                       | Week 3  | 0 | 100 | 61  | 0   |
|                       | Week 4  | 0 | 100 | 100 | 0   |
|                       | Month 2 | 0 | 100 | 100 | 100 |
| <b>Dairy</b>          | Week 1  | 2 | 80  | 0   | 0   |
|                       | Week 2  | 2 | 100 | 3   | 0   |
|                       | Week 3  | 1 | 100 | 61  | 0   |
|                       | Week 4  | 1 | 100 | 100 | 0   |
|                       | Month 2 | 1 | 100 | 100 | 100 |

---

† Excludes rice

**Table S2.** Proportion of women of each ethnic group in the postpartum taboo diet clusters

| <b>Taboo diet cluster</b>  | <b>Lao (n = 102)</b> | <b>Khmu (217)</b> | <b>Hmong (n = 328)</b> | <b>Other (n = 25)</b> |
|----------------------------|----------------------|-------------------|------------------------|-----------------------|
| <b>Most restrictive</b>    | 20 (20)              | 65 (30)           | 33 (10)                | 9 (36)                |
| <b>Least restrictive</b>   | 32 (31)              | 56 (26)           | 5 (2)                  | 6 (24)                |
| <b>2 weeks restrictive</b> | 6 (6)                | 13 (6)            | 11 (3)                 | 1 (4)                 |
| <b>1 month restrictive</b> | 44 (43)              | 83 (38)           | 279 (85)               | 9 (36)                |

Values represent n (%)

**Table S3.** Associations between allowing white rice and chicken in the first month postpartum among women belonging to the Hmong ethnic group compared to women of Lao ethnicity

| Postpartum time point | OR (95% CI) <sup>a</sup> |                  | OR (95% CI) <sup>b</sup> |                  |
|-----------------------|--------------------------|------------------|--------------------------|------------------|
|                       | White rice               | Chicken          | White rice               | Chicken          |
| <b>Week 1</b>         | 19.2 (9.0, 40.8)         | 17.7 (9.0, 34.7) | 37.9 (15.4, 93.6)        | 18.4 (8.4, 40.0) |
| <b>Week 2</b>         | 16.6 (7.8, 35.6)         | 11.2 (5.7, 21.9) | 31.1 (12.6, 76.6)        | 11.4 (5.3, 24.4) |
| <b>Week 3</b>         | 15.66 (7.3, 33.7)        | 10.6 (5.3, 21.2) | 28.9 (11.7, 71.5)        | 9.8 (4.6, 20.8)  |
| <b>Week 4</b>         | 15.9 (7.4, 34.2)         | 8.9 (4.4, 17.9)  | 28.4 (11.4, 70.7)        | 8.4 (3.9, 17.8)  |

<sup>a</sup> Bivariate associations

<sup>b</sup> Multivariable associations

p value <0.001 for all associations shown

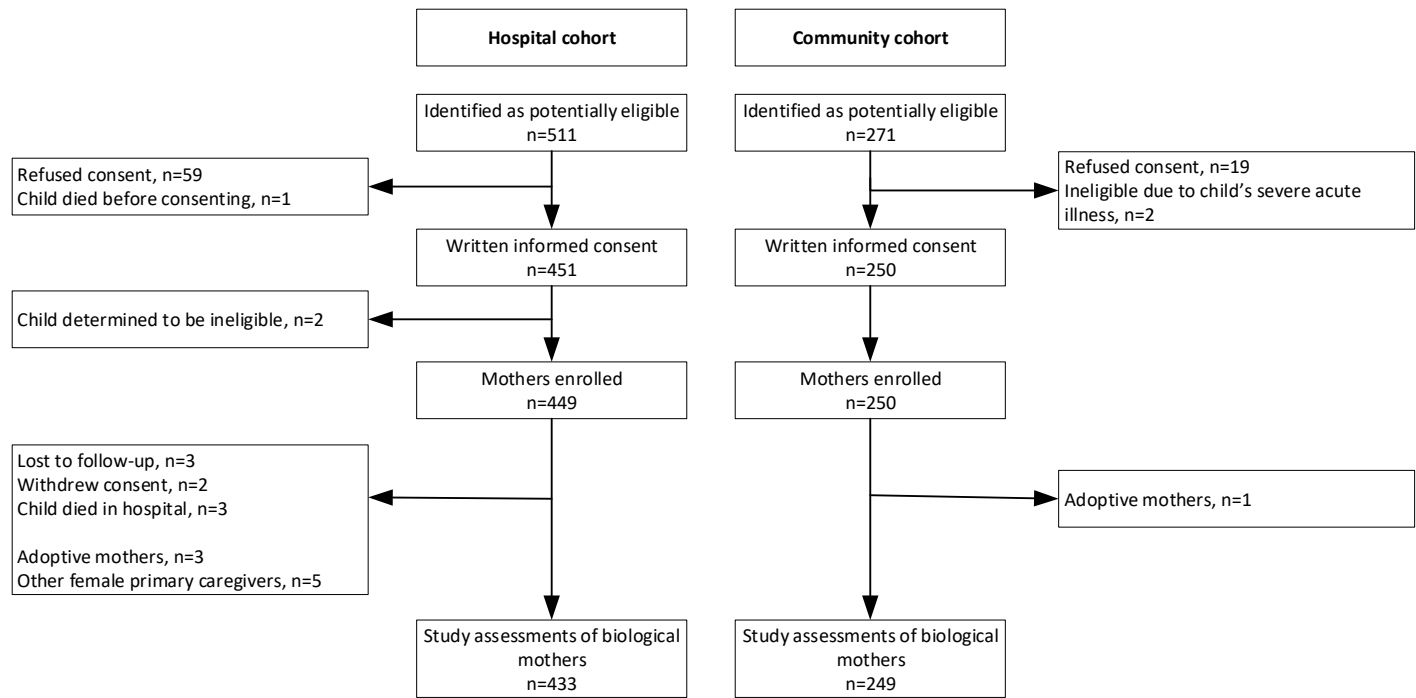

**Figure S1.** Flowchart of mother's eligibility, enrollment and data collection in the hospital and community cohorts

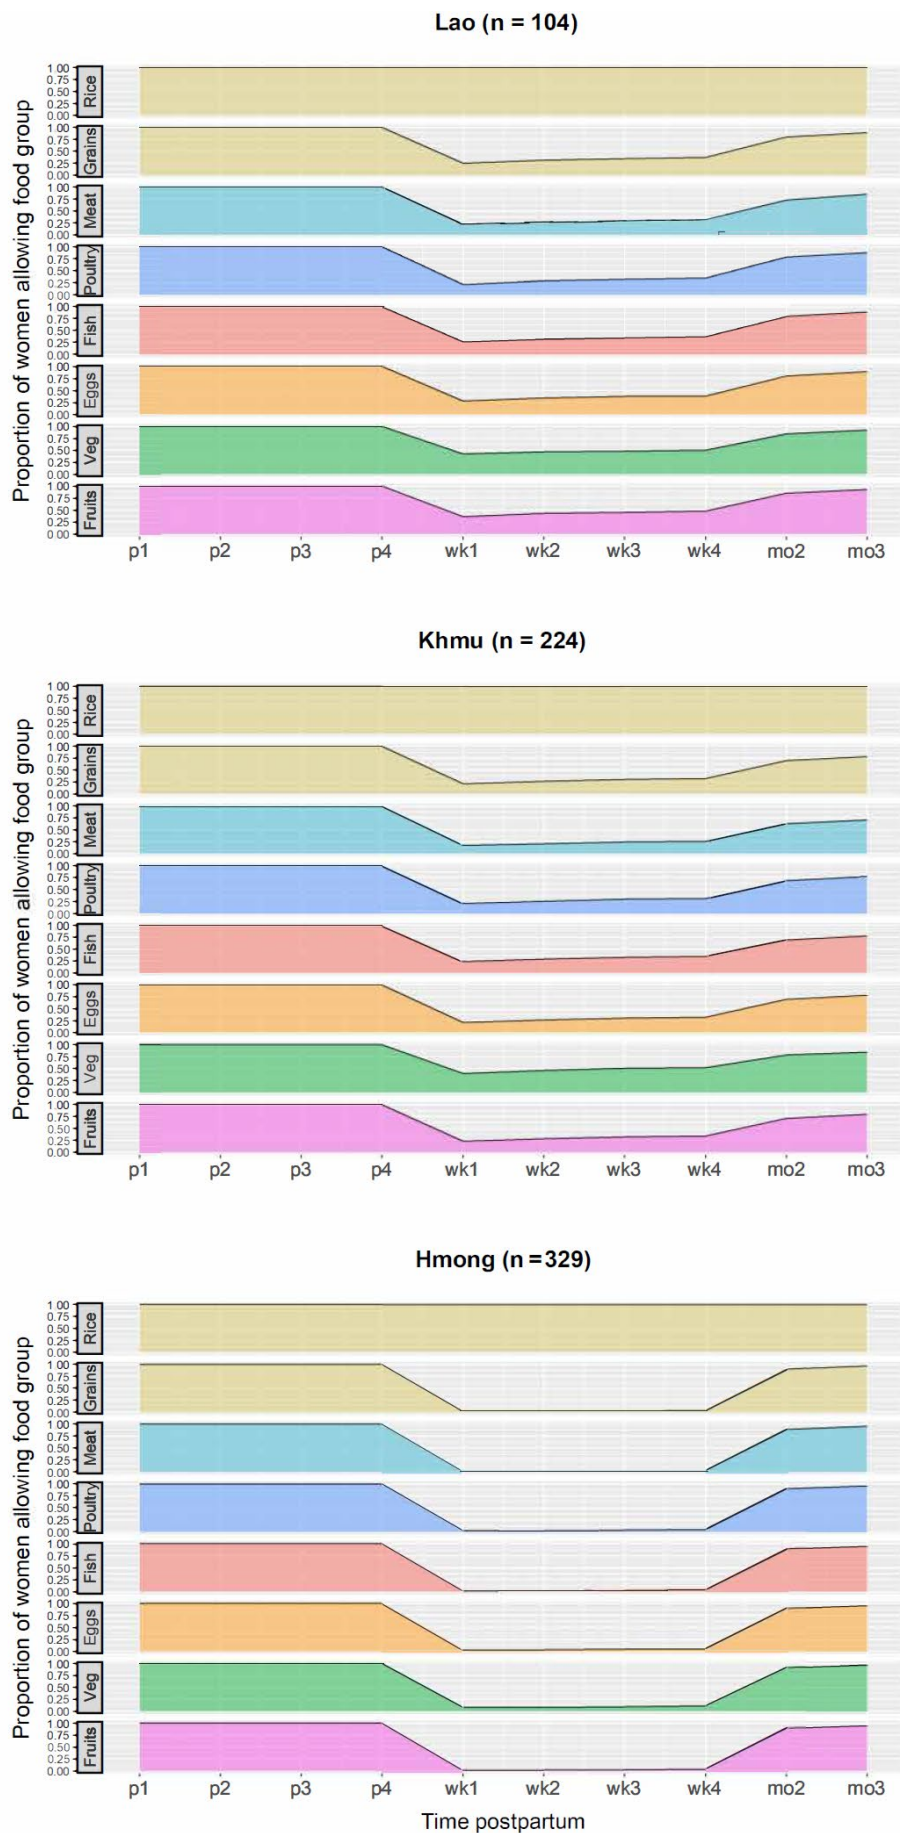

**Figure S2.** Proportion of women within each ethnic group who reported allowing food groups during pregnancy and postpartum  
 p1 = trimester 1; p2 = trimester 2; p3 = trimester 3; p4 = before birth; postpartum is in weekly for the first 4 weeks (wk1 – wk4) and monthly intervals thereafter (mo2 – mo3)
